# Supplementary material for: A Copula Based Approach for Design of Multivariate Random Forests for Drug Sensitivity Prediction
Source: PubMed Central journal article supplement (PMC4684346; doi:10.1371/journal.pone.0144490), 2015-12-10
Supplement: pone.0144490.s001.pdf [file pone.0144490.s001.pdf]

## S1: Supplementary Information for Article: *A copula based approach for design of multivariate random forests for drug sensitivity prediction*

Saad Haider<sup>1</sup>, Raziur Rahman<sup>1</sup>, Souparno Ghosh<sup>2</sup>, Ranadip Pal<sup>1,\*</sup>,

**1 Department of Electrical and Computer Engineering, Texas Tech University, Lubbock, Texas, United States**

**2 Department of Mathematics and Statistics, Texas Tech University, Lubbock, Texas, United States**

\* Corresponding Author: ranadip.pal@ttu.edu

### Changes in performance with prior feature selection

Random forest (RF) is designed to create uncorrelated trees using random subsets of features in each node of each tree. RF by itself is a great tool for feature selection from a high dimensional set of features. But we observed that the prediction accuracy is improved when a prior feature selection (RELIEFF) [1] approach is implemented. Table A shows the performance of RF, VMRF and CMRF with and without RELIEFF feature selection in 2 drug sets of GDSC.

Table A: RF, VMRF, CMRF results (5 fold cross validation) with and without prior feature selection

| Drug Set | Common Target | Drug Name | With RELIEFF |             |             | Without RELIEFF |             |             |
|----------|---------------|-----------|--------------|-------------|-------------|-----------------|-------------|-------------|
|          |               |           | <i>RF</i>    | <i>VMRF</i> | <i>CMRF</i> | <i>RF</i>       | <i>VMRF</i> | <i>CMRF</i> |
| $S_{C1}$ | EGFR          | Erlotinib | 0.5156       | 0.5193      | 0.5301      | 0.4093          | 0.4312      | 0.4384      |
|          |               | Lapatinib | 0.5544       | 0.5742      | 0.5699      | 0.4747          | 0.4722      | 0.4881      |
| $S_{C2}$ | ABL1          | AZD-0530  | 0.3553       | 0.3810      | 0.3990      | 0.1968          | 0.1919      | 0.2124      |
|          |               | TAE-684   | 0.4060       | 0.4100      | 0.4338      | 0.2216          | 0.2692      | 0.2684      |

### Performance Analysis for drugsets consisting of more than two drugs

We have generated empirical copulas for the bivariate cases as they are able to capture all forms of dependency structures. However, generation of empirical copulas has high computational complexity along with the need for a significant number of training samples at each node. Thus for more than two drug responses, we have considered parametric copulas and the difference between Gaussian copula parameters generated using root node and split node samples instead of the integral difference between empirical copulas is used. To test our hypothesis that VMRF and CMRF will perform better than RF, we considered a drug set with 4 different drugs from CCLE with single common target between them and a drug set with 3 different drugs in GDSC with a common target between them. The CCLE set has 482 cell lines and the GDSC set has 308 cell lines. RELIEFF was used to reduce the feature space prior to random forest

application. For simplicity, in this case, we've used 30% of the sample cell lines as training data and 70% of them as testing data.

The CCLE drugset is  $S_M = \{ Erlotinib, Lapatinib, ZD6474(Vandetanib), AZD0530(Saracatinib) \}$  with *EGFR* as a common target [2–5]. The correlation coefficient of the experimental and predicted response of the testing data are shown in Table B.

Table B: Results for CCLE Dataset drug sensitivity prediction for a drugset with 4 drugs in the form of correlation coefficients for *RF*, *VMRF*, *CMRF* and *KBMTL* approaches.

| Drug Set | Common Target | Drug Name | Correlation Co-efficients |             |             |              |
|----------|---------------|-----------|---------------------------|-------------|-------------|--------------|
|          |               |           | <i>RF</i>                 | <i>VMRF</i> | <i>CMRF</i> | <i>KBMTL</i> |
| $S_M$    | EGFR          | Erlotinib | 0.3533                    | 0.3604      | 0.3791      | 0.2576       |
|          |               | Lapatinib | 0.4142                    | 0.4396      | 0.4001      | 0.2682       |
|          |               | ZD-6474   | 0.2067                    | 0.1975      | 0.1907      | 0.1583       |
|          |               | AZD-0530  | 0.1419                    | 0.1539      | 0.1818      | 0.1120       |

Table B shows that the average correlation coefficient of these 4 drugs are higher for *CMRF* (0.2879) and *VMRF* (0.2878) as compared to *RF*(0.2790) in spite of *RF* performing better for couple of these drugs. All three random forest based approaches outperforms *KBMTL* in terms of correlation coefficients in this scenario.

Table C shows the predictive performance for GDSC dataset for a drugset with 3 drugs (AZD-0530, Erlotinib, Lapatinib) with common target *EGFR*. The average correlation coefficient of these 3 drugs is highest in *KBMTL* (0.5547) followed by *CMRF* (0.5130), *VMRF* (0.5116) and *RF* (0.5053).

Table C: Results for GDSC Dataset drug sensitivity prediction for a drugset with 3 drugs in the form of correlation coefficients for *RF*, *VMRF*, *CMRF* and *KBMTL* approaches.

| Drug Set | Common Target | Drug Name | Correlation Co-efficients |             |             |              |
|----------|---------------|-----------|---------------------------|-------------|-------------|--------------|
|          |               |           | <i>RF</i>                 | <i>VMRF</i> | <i>CMRF</i> | <i>KBMTL</i> |
| $S_M$    | EGFR          | AZD-0530  | 0.5869                    | 0.5875      | 0.5934      | 0.5555       |
|          |               | Erlotinib | 0.4755                    | 0.4801      | 0.5069      | 0.6615       |
|          |               | Lapatinib | 0.5316                    | 0.5493      | 0.5508      | 0.4470       |

We have also applied the methodology to the complete dataset consisting of 140 drugs in GDSC where joint prediction of 140 drugs is conducted for *VMRF*, *CMRF* and *KBMTL*. The correlation coefficients for 15 of the drugs that are common with CCLE dataset along with the average of all 140 drugs are shown in Table D while Table E shows the performance in terms of NRMSE. In terms of average correlation coefficients, *RF* performs the best followed by *VMRF*, *CMRF* and *KBMTL*. In terms of NRMSE, the average performance of *VMRF* and *CMRF* is similar followed by *RF* and *KBMTL*. It appears that for large number of drugs with minimal relationships among the drugs, univariate *RF* is often the better choice for average performance.

Tables F and G shows the performance in the form of correlation coefficients and NRMSE for predicting jointly the 24 drugs in CCLE dataset. Similar to GDSC case scenario, *RF* performs the best followed by *VMRF*, *CMRF* and *KBMTL* in terms of correlation coefficients. In terms of NRMSE, the average performance of *RF* is the best followed by *KBMTL*, *VMRF* and *CMRF*. The CCLE dataset also lends support to the conclusion that univariate random forest can outperform the Multivariate approaches when there is limited relationship among the drugs. In terms of time taken for simulation of large set of drugs, *VMRF* is the fastest followed by *RF*, *CMRF* and *KBMTL* as shown later in Table L.

Table D: Results for GDSC Dataset drug sensitivity prediction for a drugset with 140 drugs in the form of correlation coefficients is shown (only 15 drugs that are common with CCLE are shown in detail while the average represents the average of all 140 drugs).

| Drug Set                        | Common Target | Drug Name  | Correlation Coefficients |             |             |              |
|---------------------------------|---------------|------------|--------------------------|-------------|-------------|--------------|
|                                 |               |            | <i>RF</i>                | <i>VMRF</i> | <i>CMRF</i> | <i>KBMTL</i> |
| $S_M$                           | None          | 17-AAG     | 0.6209                   | 0.6283      | 0.5798      | 0.2446       |
|                                 |               | AZD-0530   | 0.1132                   | 0.0899      | 0.0881      | 0.1297       |
|                                 |               | AZD6244    | 0.3709                   | 0.3976      | 0.3520      | 0.2126       |
|                                 |               | Erlotinib  | 0.4732                   | 0.3914      | 0.4096      | 0.1802       |
|                                 |               | Lapatinib  | 0.3041                   | 0.3477      | 0.3865      | 0.0866       |
|                                 |               | Nilotinib  | 0.2926                   | 0.2101      | 0.1936      | 0.2599       |
|                                 |               | Nutlin-3   | 0.0482                   | 0.0130      | -0.0428     | 0.2297       |
|                                 |               | Paclitaxel | 0.1632                   | 0.1280      | 0.1561      | 0.1176       |
|                                 |               | PD-0325901 | 0.4097                   | 0.4029      | 0.3351      | 0.1751       |
|                                 |               | PD-0332991 | 0.1278                   | 0.0626      | 0.0850      | 0.3678       |
|                                 |               | PF2341066  | 0.2401                   | 0.1472      | 0.1438      | 0.1950       |
|                                 |               | PHA-665752 | 0.1111                   | 0.0096      | -0.0034     | 0.0117       |
|                                 |               | PLX4720    | 0.1918                   | 0.1718      | 0.1543      | 0.0214       |
|                                 |               | Sorafenib  | 0.0707                   | 0.0185      | 0.0402      | 0.0916       |
|                                 |               | TAE-684    | 0.1323                   | 0.1872      | 0.0731      | 0.0661       |
| Average Correlation Coefficient |               |            | 0.2354                   | 0.2120      | 0.1985      | 0.1553       |

Table E: Results for GDSC Dataset drug sensitivity prediction for a drugset with 140 drugs in the form of NRMSE is shown (only 15 drugs that are common with CCLE are shown in detail while the average represents the average of all 140 drugs).

| Drug Set                                  | Common Target | Drug Name  | Correlation Co-efficients |             |             |              |
|-------------------------------------------|---------------|------------|---------------------------|-------------|-------------|--------------|
|                                           |               |            | <i>RF</i>                 | <i>VMRF</i> | <i>CMRF</i> | <i>KBMTL</i> |
| $S_M$                                     | None          | 17-AAG     | 0.8481                    | 0.9223      | 0.9258      | 0.9703       |
|                                           |               | AZD-0530   | 0.9940                    | 0.9965      | 0.9965      | 0.9921       |
|                                           |               | AZD6244    | 0.9602                    | 0.9751      | 0.9783      | 0.9787       |
|                                           |               | Erlotinib  | 0.9280                    | 0.9665      | 0.9413      | 0.9842       |
|                                           |               | Lapatinib  | 0.9589                    | 0.9716      | 0.9539      | 1.0009       |
|                                           |               | Nilotinib  | 0.9913                    | 0.9966      | 0.9968      | 0.9901       |
|                                           |               | Nutlin-3   | 1.0018                    | 1.0016      | 1.0033      | 0.9742       |
|                                           |               | Paclitaxel | 0.9867                    | 0.9932      | 0.9897      | 1.0510       |
|                                           |               | PD-0325901 | 0.9427                    | 0.9675      | 0.9770      | 0.9845       |
|                                           |               | PD-0332991 | 0.9918                    | 0.9980      | 0.9969      | 0.9373       |
|                                           |               | PF2341066  | 0.9778                    | 0.9922      | 0.9915      | 0.9820       |
|                                           |               | PHA-665752 | 0.9938                    | 1.0013      | 1.0014      | 1.0059       |
|                                           |               | PLX4720    | 0.9877                    | 0.9933      | 0.9955      | 1.0047       |
|                                           |               | Sorafenib  | 0.9977                    | 0.9999      | 0.9992      | 0.9977       |
|                                           |               | TAE-684    | 0.9917                    | 0.9895      | 0.9974      | 1.0411       |
| Average Normalized Root Mean Square Error |               |            | 0.9735                    | 0.9865      | 0.9865      | 1.0065       |

Table F: Results for CCLE Dataset drug sensitivity prediction for the combined set of 24 drugs in the form of correlation coefficients.

| Drug Set                        | Common Target | Drug Name    | Correlation Co-efficients |             |             |              |
|---------------------------------|---------------|--------------|---------------------------|-------------|-------------|--------------|
|                                 |               |              | <i>RF</i>                 | <i>VMRF</i> | <i>CMRF</i> | <i>KBMTL</i> |
| $S_M$                           | None          | 17-AAG       | 0.2792                    | 0.2028      | 0.2606      | 0.2159       |
|                                 |               | AZD-0530     | 0.3042                    | 0.3001      | 0.2708      | 0.2839       |
|                                 |               | AZD6244      | 0.4978                    | 0.3637      | 0.3799      | 0.5366       |
|                                 |               | Erlotinib    | 0.3682                    | 0.3206      | 0.3160      | 0.3525       |
|                                 |               | Lapatinib    | 0.3073                    | 0.3059      | 0.2671      | 0.2252       |
|                                 |               | Nilotinib    | 0.5471                    | 0.5581      | 0.5024      | 0.4194       |
|                                 |               | Nutlin-3     | 0.3715                    | 0.3756      | 0.3921      | 0.3211       |
|                                 |               | Paclitaxel   | 0.4342                    | 0.3649      | 0.4444      | 0.4475       |
|                                 |               | PD-0325901   | 0.5671                    | 0.4699      | 0.4482      | 0.5782       |
|                                 |               | PD-0332991   | 0.5136                    | 0.4987      | 0.4988      | 0.4329       |
|                                 |               | PF2341066    | 0.4828                    | 0.4863      | 0.4559      | 0.4439       |
|                                 |               | PHA-665752   | 0.4669                    | 0.4573      | 0.4254      | 0.4169       |
|                                 |               | PLX4720      | 0.3750                    | 0.3724      | 0.3331      | 0.1323       |
|                                 |               | Sorafenib    | 0.5162                    | 0.5073      | 0.4714      | 0.4035       |
|                                 |               | TAE-684      | 0.3972                    | 0.4035      | 0.3980      | 0.3904       |
|                                 |               | AEW541       | 0.4379                    | 0.4236      | 0.3167      | 0.3646       |
|                                 |               | Irinotecan   | 0.6063                    | 0.5921      | 0.5989      | 0.6305       |
|                                 |               | L-685458     | 0.6379                    | 0.6233      | 0.6286      | 0.5754       |
|                                 |               | LBW242       | 0.0740                    | 0.1125      | 0.0433      | 0.0951       |
|                                 |               | Panobinostat | 0.7073                    | 0.7335      | 0.6836      | 0.6472       |
|                                 |               | RAF265       | 0.2976                    | 0.3177      | 0.2756      | 0.2113       |
|                                 |               | TKI258       | 0.5127                    | 0.4988      | 0.4912      | 0.4148       |
|                                 |               | Topotecan    | 0.6016                    | 0.5876      | 0.6003      | 0.6129       |
|                                 |               | ZD-6474      | 0.3089                    | 0.3274      | 0.2619      | 0.2590       |
| Average Correlation Coefficient |               |              | 0.4422                    | 0.4251      | 0.4068      | 0.3921       |

Table G: Results for CCLE Dataset drug sensitivity prediction for the combined set of 24 drugs in the form of Normalized Root Mean Square Error.

| Drug Set                                  | Common Target | Drug Name    | NRMSE     |             |             |              |
|-------------------------------------------|---------------|--------------|-----------|-------------|-------------|--------------|
|                                           |               |              | <i>RF</i> | <i>VMRF</i> | <i>CMRF</i> | <i>KBMTL</i> |
| $S_M$                                     | None          | 17-AAG       | 0.9747    | 0.9854      | 0.9805      | 0.9979       |
|                                           |               | AZD-0530     | 0.9669    | 0.9724      | 0.9740      | 0.9672       |
|                                           |               | AZD6244      | 0.9274    | 0.9611      | 0.9770      | 0.8526       |
|                                           |               | Erlotinib    | 0.9404    | 0.9604      | 0.9668      | 0.9405       |
|                                           |               | Lapatinib    | 0.9520    | 0.9638      | 0.9744      | 0.9777       |
|                                           |               | Nilotinib    | 0.8980    | 0.8992      | 0.9437      | 0.9204       |
|                                           |               | Nutlin-3     | 0.9431    | 0.9476      | 0.9650      | 0.9489       |
|                                           |               | Paclitaxel   | 0.9143    | 0.9457      | 0.9533      | 0.9186       |
|                                           |               | PD-0325901   | 0.9194    | 0.9613      | 0.9779      | 0.8330       |
|                                           |               | PD-0332991   | 0.8707    | 0.8934      | 0.9394      | 0.9026       |
|                                           |               | PF2341066    | 0.9027    | 0.9140      | 0.9543      | 0.9016       |
|                                           |               | PHA-665752   | 0.8958    | 0.9085      | 0.9490      | 0.9101       |
|                                           |               | PLX4720      | 0.9432    | 0.9517      | 0.9768      | 0.9964       |
|                                           |               | Sorafenib    | 0.9010    | 0.9182      | 0.9581      | 0.9162       |
|                                           |               | TAE-684      | 0.9470    | 0.9538      | 0.9797      | 0.9262       |
|                                           |               | AEW541       | 0.9440    | 0.9540      | 0.9854      | 0.9337       |
|                                           |               | Irinotecan   | 0.8373    | 0.8684      | 0.9256      | 0.7763       |
|                                           |               | L-685458     | 0.8125    | 0.8412      | 0.9184      | 0.8430       |
|                                           |               | LBW242       | 1.0011    | 0.9937      | 0.9995      | 1.0071       |
|                                           |               | Panobinostat | 0.7651    | 0.7999      | 0.9039      | 0.7813       |
|                                           |               | RAF265       | 0.9589    | 0.9624      | 0.9810      | 0.9910       |
|                                           |               | TKI258       | 0.8842    | 0.9085      | 0.9502      | 0.9106       |
|                                           |               | Topotecan    | 0.8410    | 0.8753      | 0.9268      | 0.7919       |
|                                           |               | ZD-6474      | 0.9556    | 0.9601      | 0.9754      | 0.9749       |
| Average Normalized Root Mean Square Error |               |              | 0.9124    | 0.9292      | 0.9599      | 0.9134       |

## Robustness analysis of $\alpha$ (Method-2) using synthetic example

At first, we have analyzed robustness of  $\alpha$  generated using pareto frontier approach by adding noise to the drug response data and comparing with the  $\alpha$  generated from the response without noise. This simulation was conducted using simulated data generated from the same framework mentioned in the synthetic example included in main manuscript. 4 different sets of synthetic data sets were created with different number of samples and corresponding  $\alpha$  values are reported for with and without noise added to the drug response (table H). In all cases, we have used 30% of the sample cell lines as training data and 70% of them as testing data. Number of trees were 100 in all cases.

Table H: Comparison of  $\alpha$  for different sets of synthetic data with and without noise added to the drug response.

| Drug Set | Number of Samples | $\alpha$      |            |
|----------|-------------------|---------------|------------|
|          |                   | Without noise | With noise |
| $S_1$    | 200               | 6.23          | 7.63       |
| $S_2$    | 250               | 4.53          | 5.05       |
| $S_3$    | 300               | 4.66          | 5.15       |
| $S_4$    | 350               | 4.43          | 4.95       |

Finally, we have analyzed the robustness by comparing  $\alpha$  generated using different selections of random subsets of the original samples. Table I shows the  $\alpha$  values generated from a drugset with  $N=350$  samples and with random subset of the same data with  $0.9N$ ,  $0.8N$ ,  $0.7N$  samples.

Table I: Comparison of  $\alpha$ s for different selections of random subsets of the original samples in a specific synthetic dataset. Original number of samples were 350 in this particular example.

| Drug Set | Number of Samples | $\alpha$ |
|----------|-------------------|----------|
| $S_N$    | $N$               | 4.43     |
|          | $0.9N$            | 4.88     |
|          | $0.8N$            | 5.16     |
|          | $0.5N$            | 0.63     |

## Simulation Time Complexity

Simulation time of drugsets  $S_{C1}$ ,  $S_{C2}$  and  $S_{C3}$  of GDSC are reported in Table J for RF, VMRF and CMRF methods. The reported simulation times are the time needed to generate complete result for all drugs in a drug set for 5 fold cross validation. Simulation was conducted in a Intel Core i7 computer with 16GB RAM. 4 labs had been used while running the simulation under MATLABPOOL.

Table J: Simulation time for different drugsets in GDSC data. The reported simulation times are the time needed to generate complete result for all drugs in a drug set for 5 fold cross validation.

| Drug Set | Number of Samples | Simulation Time (seconds) |      |                  |
|----------|-------------------|---------------------------|------|------------------|
|          |                   | RF                        | VMRF | CMRF (Empirical) |
| $S_{C1}$ | 316               | 982                       | 613  | 13850            |
| $S_{C2}$ | 349               | 1110                      | 690  | 15400            |
| $S_{C3}$ | 645               | 2192                      | 1282 | 28764            |

In addition to 5-fold cross validation simulation times, we are reporting the simulation times with 30% of the sample cell lines as training data and 70% of them as testing data in Table K . We are also including the CMRF (parametric) simulation time in table K . Table L shows the simulation times for predicting all drugs jointly for GDSC and CCLE datasets using RF, VMRF, CMRF (parameteric) and KBMTL approaches. Similar to Table K, we have used 30% of the cell lines as training data and 70% of them as testing data.

Table K: Simulation time for different drugsets in GDSC data. The reported simulation times are the time needed to generate complete result for all drugs in a drug set for 30-70 case.

| Drug Set | Number of Samples | Simulation Time (seconds) |      |                  |                   |
|----------|-------------------|---------------------------|------|------------------|-------------------|
|          |                   | RF                        | VMRF | CMRF (Empirical) | CMRF (Parametric) |
| $S_{C1}$ | 316               | 169                       | 90   | 734              | 412               |
| $S_{C2}$ | 349               | 190                       | 105  | 795              | 455               |
| $S_{C3}$ | 645               | 350                       | 190  | 1510             | 850               |

Table L: Simulation time for different methods for all drugs of GDSC dataset (140) and CCLE dataset (24). The reported simulation times are the time (in seconds) needed to generate complete result for all drugs for 30-70 case.

| Method Name                | GDSC dataset | CCLE dataset |
|----------------------------|--------------|--------------|
| Random Forest              | 3,930        | 833.47       |
| Multivariate Random Forest | 51.17        | 45.70        |
| Parametric CMRF            | 21,700       | 1,230        |
| KBMTL                      | 192,000      | 46,400       |

## References

1. Robnik-Sikonja M, Kononenko I. Theoretical and empirical analysis of ReliefF and RReliefF. *Machine Learning*. 2003;53:23–69.
2. Ling YH, Li T, Yuan Z, Haigentz M, Weber TK, Perez-Soler R. Erlotinib, an effective epidermal growth factor receptor tyrosine kinase inhibitor, induces p27KIP1 up-regulation and nuclear translocation in association with cell growth inhibition and G1/S phase arrest in human non-small-cell lung cancer cell lines. *Molecular pharmacology*. 2007;72(2):248–258.
3. Johnston SR, Leary A. Lapatinib: a novel EGFR/HER2 tyrosine kinase inhibitor for cancer. *Drugs Today (Barc)*. 2006;42(7):441–453.
4. Morabito A, Piccirillo MC, Falasconi F, De Feo G, Del Giudice A, Bryce J, et al. Vandetanib (ZD6474), a dual inhibitor of vascular endothelial growth factor receptor (VEGFR) and epidermal growth factor receptor (EGFR) tyrosine kinases: current status and future directions. *The oncologist*. 2009;14(4):378–390.
5. Larsen AB, Stockhausen MT, Poulsen HS. Cell adhesion and EGFR activation regulate EphA2 expression in cancer. *Cellular signalling*. 2010;22(4):636–644.
